# Supplementary material
Source: publisher figshare collection journal article supplement (https://acs.figshare.com/ndownloader/files/3720940)
Supplement: Supplementary file 1 [file 3720940]

## SUPPLEMENTAL METHODS

**Bacterial strains and growth conditions.** Transformations performed with 2-5  $\mu$ L of the reaction into 6-15  $\mu$ L of Alpha Select Gold Efficiency *E. coli* cells (Bioline USA Inc., Taunton, MA, USA) following the manufacturer's protocol. Cells were plated on appropriate antibiotic selective LB agar, supplemented with 80  $\mu$ L of 20 mg/ $\mu$ L 5-bromo-4-chloro-3-indolyl  $\beta$ -D-galactopyranoside (X-GAL) and 100  $\mu$ L of 0.1M isopropyl- $\beta$ -D-thiogalactopyranoside (IPTG) (Zymo Research Corp., Irvine, CA, USA). Blue-white screening was used to select colonies which were grown overnight at 37°C in LB supplemented with the appropriate antibiotic.

**Basic parts.** Basic parts were either amplified from plasmids obtained from BioBricks (<http://partsregistry.org/>) or Addgene (Addgene, Cambridge, MA, USA) or, if the part was less than 35 bp, were assembled using annealing oligonucleotides containing the appropriate fusion sites and BsaI restriction sequences. PCR reactions were performed as above. Complimentary oligonucleotides were heated to 95°C and cooled at a rate of 0.5°C/minute to a final temperature of 45°C before being diluted for use in a MoClo reaction as above.

**Creating destination vectors:** The *lacZ* alpha fragment was PCR amplified pMJS2AF (donated by Dr. Michael Smanski) and subsequently cloned into two backbones: DVA vectors used pSB1A2, DVK vectors used pSB1K3. DNA containing the *lacZ* alpha fragment was used as template for PCR reactions (20 fmol). PCR reactions with Phusion DNA polymerase (NEB) following the manufacturer's protocol and were performed as follows: denaturation at 95°C for 1', 30 extension cycles (98°C 20", 61°C 20", 72°C 20"), 5' extension at 72°C, hold 4°C. PCR product was gel extracted and cleaned using QIAquick PCR Purification Kits (Qiagen Inc., Valencia, CA, USA). LacZ PCR products and pSB1K3 and pSB1A2 vectors were digested with SpeI enzyme (NEB) according to the manufacturer's protocol, cleaned up using the QIAquick PCR Purification Kit (Qiagen). Ligation reactions used T4 DNA ligase (NEB).

**Plasmid isolation and sequence analysis.** Plasmids were purified using the QIAprep Spin Miniprep kit (Qiagen) following the manufacturers' protocols. Sequences were analyzed using Benchling (San Francisco, CA, USA).

**Flow Cytometry:** All fluorescent expression devices were characterized using a BD LSRIIFortessa SORP flow cytometer. RFP fluorescence was measured using a solid-state Coherent Sapphire 561 nm laser at 100 mw strength with a PE-Texas Red 610/20 filter. GFP fluorescence was measured using a solid-state Coherent Sapphire 488 nm laser at 200 mw strength with a FITC 530/30 filter. Clonal colonies were grown overnight on agar with antibiotic and were used to inoculate 200  $\mu$ L LB broth (Sigma-Aldrich) with the appropriate antibiotic in sterile 96-deep well plates in triplicate grown for 16 hours, 37°C shaking, 300 rpm. Cells were then diluted 100-fold into 200  $\mu$ L of sterile phosphate buffered saline in 96-well round bottom plates before measurement.

### **Supplemental Figure 1 | Array of GFP expression plasmids with varied promoter and RBS parts.**

An array of 96 plasmids each containing a specific GFP expressing transcriptional unit were analyzed by flow cytometry and normalized using SpheroTech RCP-30-5-A beads to provide MEFL units. The x-axis is ordered by relative promoter strength. This array provided an estimate of promoter and RBS strength which was used to determine which promoters and RBS parts to include in the library.

### **Supplemental Figure 2 | Multiplex MoClo (MMC) cloning efficiency and expression data.**

Modularity of the MoClo parts allows for simultaneous assembly of combinatorial designs through part multiplexing. Any part type can be multiplexed by adding multiple different parts of the same type such that the total concentration of each part type is equimolar. This is demonstrated in (a) where five promoters were combined with a single RBS, CDS, terminator and vector to create five variant transcriptional units. Likewise, in (b), 5 promoters and 5 RBS parts were combined to produce twenty-five iterations of the same fluorescent transcriptional unit. Data for (a) and (b) can be seen in panel (c) where randomly chosen clones from each multiplex reaction were selected, grown overnight and screened by flow cytometry to demonstrate the range of expression available with a simple multiplex assembly. pJXB2Gm contains five different promoter and the BCD2 RBS part driving GFP while the pJXRBSRm reaction used five different promoters and five different RBS parts to control expression of RFP. Points represent single clonal populations isolated from multiplex plates and each clone contains a single promoter:RBS combination. These points are spread laterally for viewing ease. Fluorescence is recorded in MEFL units.

### **Supplemental Table 1 | CIDAR optimized MoClo protocols.**

Three protocols have been developed to optimize reaction time and cloning efficiency. The Standard Protocol provides >80% efficiency (>80% of all clones are correct with more than 200 colonies per plate in an 82.5 minute reaction time. It is ideal for simple 4-part + vector assemblies. The Troubleshooting protocol is used for more 6 part + vector reactions and in Multiplexed MoClo to provide a larger number of correctly assembled clones. The Rapid protocol was designed for quickly assembling basic parts from PCR product or annealed oligos where only one part is being ligated to a vector. The longer initial digestion time could also be adopted in the Standard and Troubleshooting protocols to increase efficiency if needed.

### **Supplemental Table 2 | List of all parts and vectors contained in the CIDAR MoClo**

**Library.** Lower case “m” at the end of a part ID denotes modifications to the source sequence. In the case of the RBS parts, this indicates 4 bp upstream and 5 bp downstream of the part to mimic the BioBricks scar to conserve behavior. Coding sequences have occasionally been modified to remove illegal restriction sites (BbsI or BsaI) which interfere with cloning. In all cases, synonymous mutations are used to disrupt the recognition sequence without changing the amino acid sequence. DVA also contains a modification from the pSB1A2 sequence to change an illegal site in the bla (ampicillin resistance) coding sequence. The Backbone is described as either DVA or DVK indicating either ampicillin or kanamycin resistance respectively, and all vectors are based on a pMB1 origin of replication. Plasmids containing transcriptional units are given abbreviated names which indicate their components. In the case of the fluorescent reporters listed here, pJ024m indicates a plasmid containing J23102, B0034m, and either RFP

(Rm, E1010m), GFP (Gm, E0040m), or both. The BCD parts listed here are not true RBS parts as they contain a small transcriptional unit and secondary RBS to decouple transcriptional and translational control as described in Mutalik et al.<sup>12</sup>. They are treated as RBS parts within this assembly methodology. More information on these parts can be found at [www.cidar-ice.org](http://www.cidar-ice.org) and in a public Benchling folder ([https://benchling.com/siverson/f\\_/B94YxDHhQh-cidar-moclo-library](https://benchling.com/siverson/f_/B94YxDHhQh-cidar-moclo-library)). New DVAs and DVKs can be created using empty DVA and DVK stocks provided in this kit with a SpeI digestion of the vector and a PCR amplified LacZa fragment flanked by the desired fusion sites.

pJXGm\_AE(K) series reordered

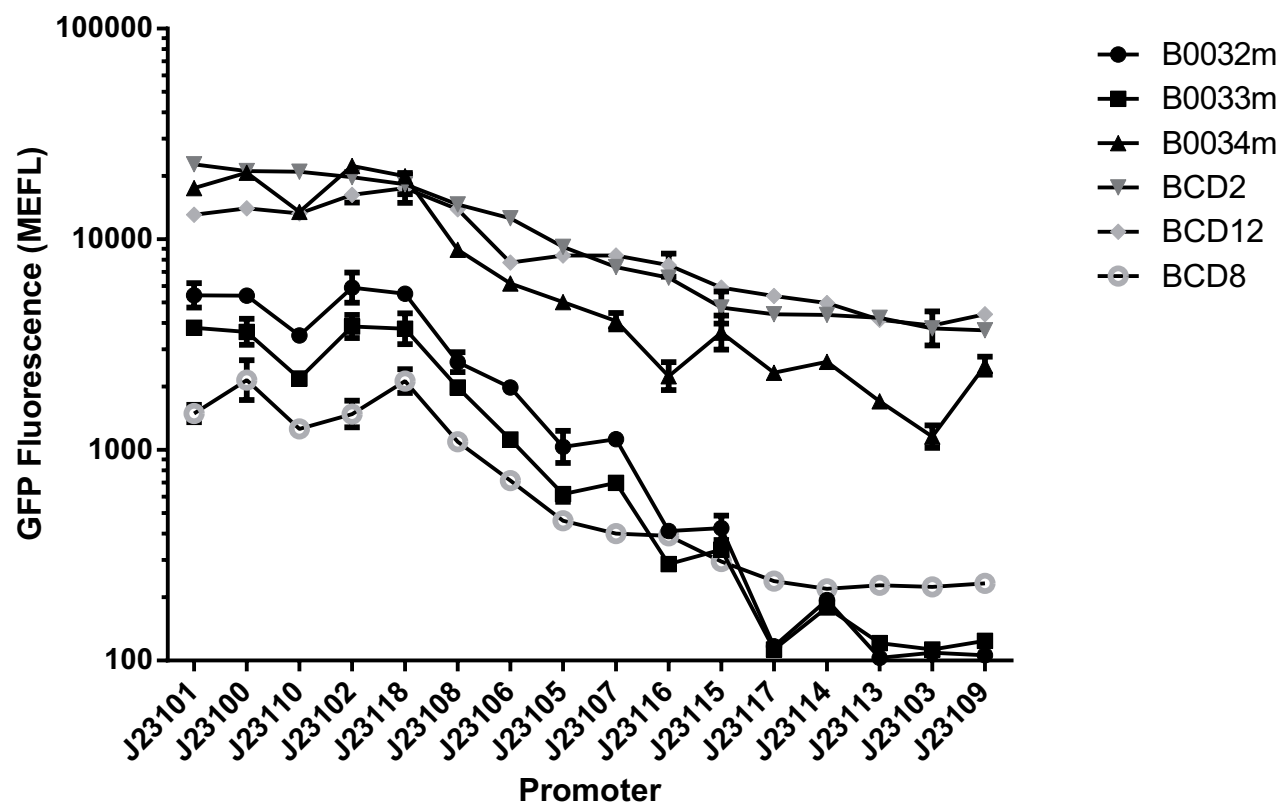

a

pJXB2Gm - MMCL1-6

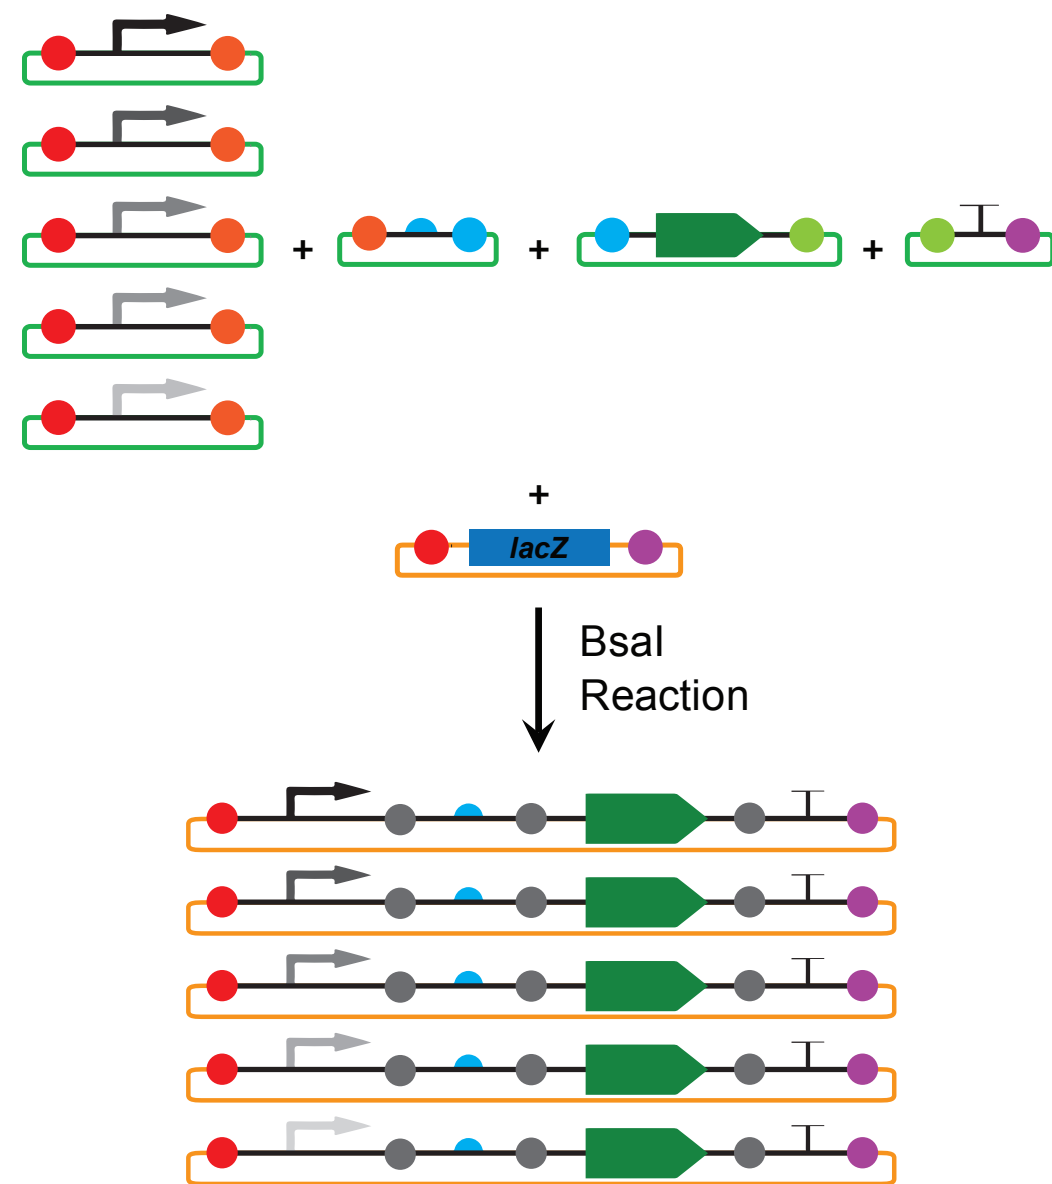

b

pJXRBSRm - MMCL1-20

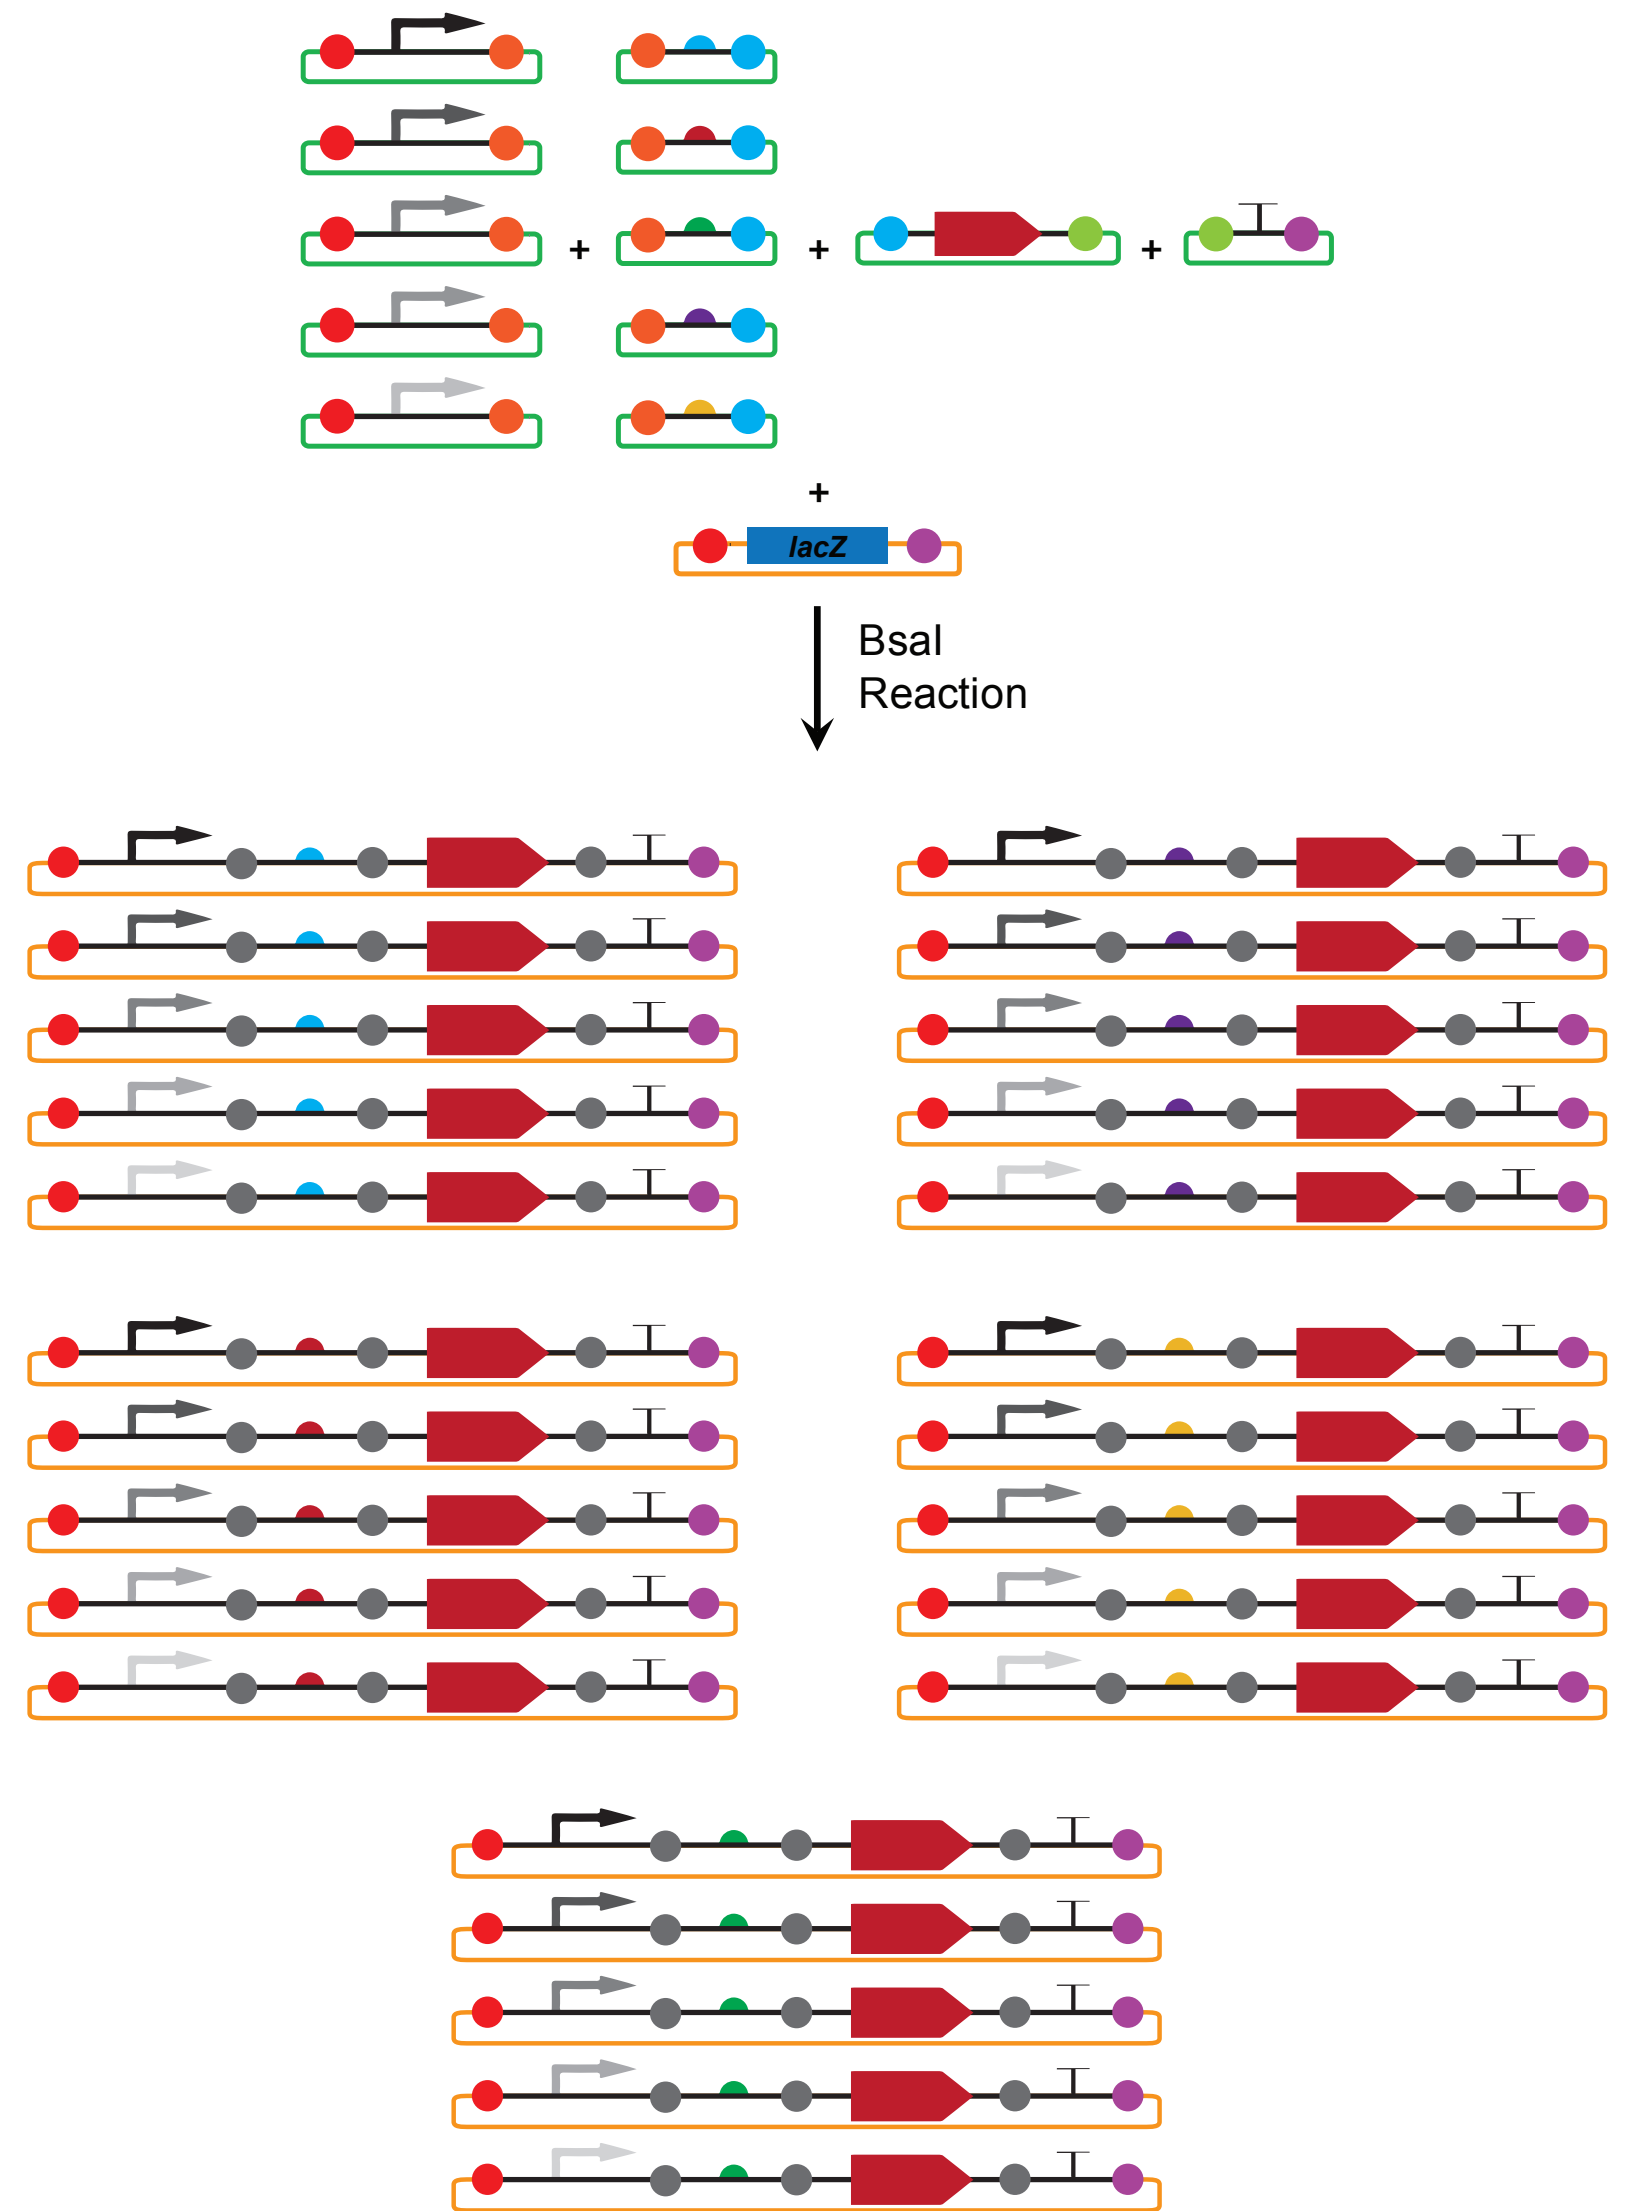

c

Multiplex expression tuning with MoClo

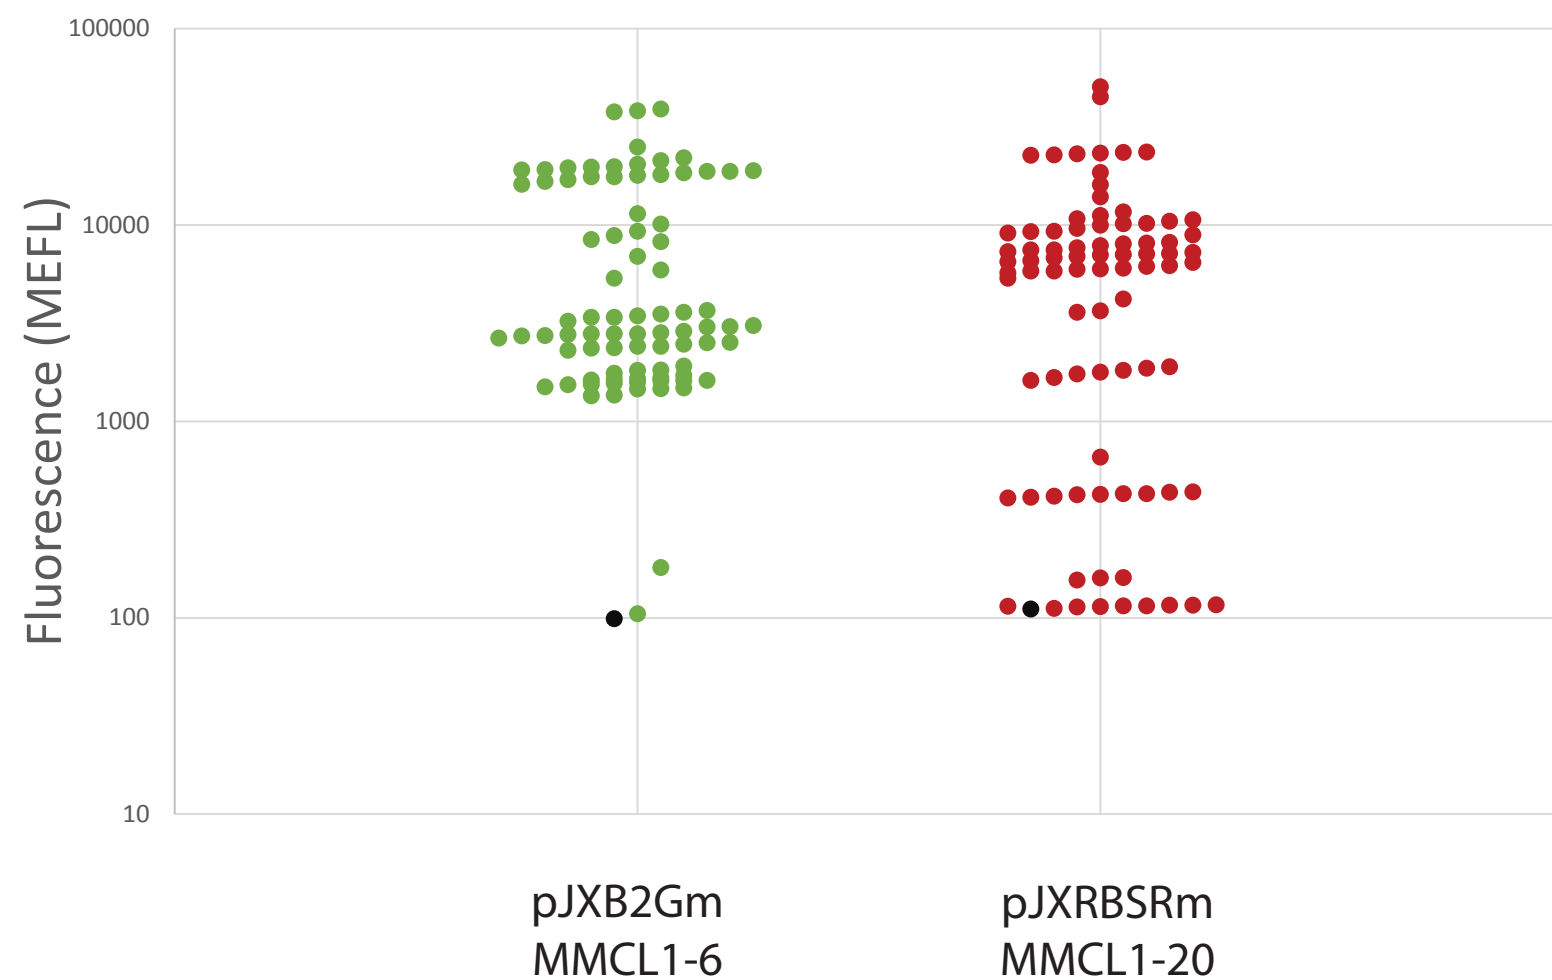

Each possible transcriptional unit has an equal probability of assembly in a Multiplex MoClo assuming eqimolar concentration of each promoter and each RBS part.

## CIDAR MoClo Protocols

|                   | Step       | Temp | Time (min) |
|-------------------|------------|------|------------|
| Standard protocol | Step 1     | 37°C | 1.5        |
|                   | Step 2     | 16°C | 3          |
|                   | Cycle 1-2  | x15  |            |
|                   | Step 3     | 50°C | 5          |
|                   | Step 4     | 80°C | 10         |
|                   | Total time |      | 82.5       |

|                          |            |      |       |
|--------------------------|------------|------|-------|
| Troubleshooting protocol | Step 1     | 37°C | 1.5   |
|                          | Step 2     | 16°C | 3     |
|                          | Cycle 1-2  | x25  |       |
|                          | Step 3     | 50°C | 5     |
|                          | Step 4     | 80°C | 10    |
|                          | Total time |      | 127.5 |

|                           |            |       |         |
|---------------------------|------------|-------|---------|
| Rapid protocol            | Step 1     | 37°C  | 20      |
| Ideal for new basic parts | Step 2     | 37°C  | 1.5     |
|                           | Step 3     | 16°C  | 3       |
|                           | Cycle 2-3  | x5-10 |         |
|                           | Step 4     | 50°C  | 5       |
|                           | Step 5     | 80°C  | 10      |
|                           | Total time |       | 37.5-60 |

### Reaction Conditions

#### **Basic Part or Device (DVA Reactions)**

10 fmol each part  
 1x Promega Ligase buffer  
 20 U/rxn T4 Ligase (NEB or Promega)  
 10 U/rxn BbsI  
 Total Volume: 10 -20uL

#### **Transcriptional Unit (DVK Reactions)**

10 fmol each part  
 1x Promega Ligase buffer  
 20 U/rxn T4 Ligase (NEB or Promega)  
 10 U/rxn BsaI  
 Total Volume: 10 -20uL

Transform 2-5 uL per reaction

| <i>Plasmid</i>   | <i>Part Description</i>              | <i>Seq Source</i>              | <i>Backbone</i> | <i>Addgene Cat#<br/>(addgene.org)</i> | <i>ICE ID<br/>(cidar-ice.org)</i> | <i>Benchling<br/>(benchling.com)</i>                                                      |
|------------------|--------------------------------------|--------------------------------|-----------------|---------------------------------------|-----------------------------------|-------------------------------------------------------------------------------------------|
| <i>J23100_AB</i> | Basic Part - Promoter (Constitutive) | parts.igem.org/Part:Bba_J23100 | DVA             | 65980                                 | CIDAR_490                         | <a href="https://benchling.com/s/gS6lXC3X/edit">https://benchling.com/s/gS6lXC3X/edit</a> |
| <i>J23100_FB</i> | Basic Part - Promoter (Constitutive) | parts.igem.org/Part:Bba_J23100 | DVA             | 65981                                 | CIDAR_491                         | <a href="https://benchling.com/s/aq8Gxp2O/edit">https://benchling.com/s/aq8Gxp2O/edit</a> |
| <i>J23100_GB</i> | Basic Part - Promoter (Constitutive) | parts.igem.org/Part:Bba_J23100 | DVA             | 65982                                 | CIDAR_492                         | <a href="https://benchling.com/s/rTzq9ToN/edit">https://benchling.com/s/rTzq9ToN/edit</a> |
| <i>J23102_AB</i> | Basic Part - Promoter (Constitutive) | parts.igem.org/Part:Bba_J23102 | DVA             | 65983                                 | CIDAR_493                         | <a href="https://benchling.com/s/5yn5Zy6g/edit">https://benchling.com/s/5yn5Zy6g/edit</a> |
| <i>J23102_FB</i> | Basic Part - Promoter (Constitutive) | parts.igem.org/Part:Bba_J23102 | DVA             | 65984                                 | CIDAR_494                         | <a href="https://benchling.com/s/aQOLd1xr/edit">https://benchling.com/s/aQOLd1xr/edit</a> |
| <i>J23102_GB</i> | Basic Part - Promoter (Constitutive) | parts.igem.org/Part:Bba_J23102 | DVA             | 65985                                 | CIDAR_495                         | <a href="https://benchling.com/s/zOCQC6dM/edit">https://benchling.com/s/zOCQC6dM/edit</a> |
| <i>J23103_AB</i> | Basic Part - Promoter (Constitutive) | parts.igem.org/Part:Bba_J23103 | DVA             | 65986                                 | CIDAR_496                         | <a href="https://benchling.com/s/1pfiY4NG/edit">https://benchling.com/s/1pfiY4NG/edit</a> |
| <i>J23103_FB</i> | Basic Part - Promoter (Constitutive) | parts.igem.org/Part:Bba_J23103 | DVA             | 65987                                 | CIDAR_497                         | <a href="https://benchling.com/s/LmBWThyt/edit">https://benchling.com/s/LmBWThyt/edit</a> |
| <i>J23103_GB</i> | Basic Part - Promoter (Constitutive) | parts.igem.org/Part:Bba_J23103 | DVA             | 65988                                 | CIDAR_498                         | <a href="https://benchling.com/s/9KEsWqta/edit">https://benchling.com/s/9KEsWqta/edit</a> |
| <i>J23106_AB</i> | Basic Part - Promoter (Constitutive) | parts.igem.org/Part:Bba_J23106 | DVA             | 65989                                 | CIDAR_499                         | <a href="https://benchling.com/s/ynovZBP9/edit">https://benchling.com/s/ynovZBP9/edit</a> |
| <i>J23106_FB</i> | Basic Part - Promoter (Constitutive) | parts.igem.org/Part:Bba_J23106 | DVA             | 65990                                 | CIDAR_500                         | <a href="https://benchling.com/s/oZSwbWfi/edit">https://benchling.com/s/oZSwbWfi/edit</a> |
| <i>J23106_GB</i> | Basic Part - Promoter (Constitutive) | parts.igem.org/Part:Bba_J23106 | DVA             | 65991                                 | CIDAR_501                         | <a href="https://benchling.com/s/4qwyO9ja/edit">https://benchling.com/s/4qwyO9ja/edit</a> |
| <i>J23107_AB</i> | Basic Part - Promoter (Constitutive) | parts.igem.org/Part:Bba_J23107 | DVA             | 65992                                 | CIDAR_502                         | <a href="https://benchling.com/s/riO8LQFW/edit">https://benchling.com/s/riO8LQFW/edit</a> |
| <i>J23107_FB</i> | Basic Part - Promoter (Constitutive) | parts.igem.org/Part:Bba_J23107 | DVA             | 65993                                 | CIDAR_503                         | <a href="https://benchling.com/s/ljtaz48p/edit">https://benchling.com/s/ljtaz48p/edit</a> |
| <i>J23107_GB</i> | Basic Part - Promoter (Constitutive) | parts.igem.org/Part:Bba_J23107 | DVA             | 65994                                 | CIDAR_504                         | <a href="https://benchling.com/s/b8wazW5M/edit">https://benchling.com/s/b8wazW5M/edit</a> |
| <i>J23116_AB</i> | Basic Part - Promoter (Constitutive) | parts.igem.org/Part:Bba_J23116 | DVA             | 65995                                 | CIDAR_505                         | <a href="https://benchling.com/s/UqDZklx7/edit">https://benchling.com/s/UqDZklx7/edit</a> |
| <i>J23116_FB</i> | Basic Part - Promoter (Constitutive) | parts.igem.org/Part:Bba_J23116 | DVA             | 65996                                 | CIDAR_506                         | <a href="https://benchling.com/s/G8ouTfIM/edit">https://benchling.com/s/G8ouTfIM/edit</a> |
| <i>J23116_GB</i> | Basic Part - Promoter (Constitutive) | parts.igem.org/Part:Bba_J23116 | DVA             | 65997                                 | CIDAR_507                         | <a href="https://benchling.com/s/SGzIA9lZ/edit">https://benchling.com/s/SGzIA9lZ/edit</a> |
| <i>R0010_AB</i>  | Basic Part - Promoter (Controllable) | parts.igem.org/Part:Bba_R0010  | DVA             | 65998                                 | CIDAR_508                         | <a href="https://benchling.com/s/0mSZV0LM/edit">https://benchling.com/s/0mSZV0LM/edit</a> |
| <i>R0010_FB</i>  | Basic Part - Promoter (Controllable) | parts.igem.org/Part:Bba_R0010  | DVA             | 65999                                 | CIDAR_509                         | <a href="https://benchling.com/s/InUiHbMF/edit">https://benchling.com/s/InUiHbMF/edit</a> |
| <i>R0010_GB</i>  | Basic Part - Promoter (Controllable) | parts.igem.org/Part:Bba_R0010  | DVA             | 66000                                 | CIDAR_510                         | <a href="https://benchling.com/s/1mQPZFtM/edit">https://benchling.com/s/1mQPZFtM/edit</a> |
| <i>R0040_AB</i>  | Basic Part - Promoter (Controllable) | parts.igem.org/Part:Bba_R0040  | DVA             | 66001                                 | CIDAR_511                         | <a href="https://benchling.com/s/xqAO8tJl/edit">https://benchling.com/s/xqAO8tJl/edit</a> |
| <i>R0040_FB</i>  | Basic Part - Promoter (Controllable) | parts.igem.org/Part:Bba_R0040  | DVA             | 66002                                 | CIDAR_512                         | <a href="https://benchling.com/s/o8lvrlDl/edit">https://benchling.com/s/o8lvrlDl/edit</a> |
| <i>R0040_GB</i>  | Basic Part - Promoter (Controllable) | parts.igem.org/Part:Bba_R0040  | DVA             | 66003                                 | CIDAR_513                         | <a href="https://benchling.com/s/YYNkGLBV/edit">https://benchling.com/s/YYNkGLBV/edit</a> |
| <i>R0063_AB</i>  | Basic Part - Promoter (Controllable) | parts.igem.org/Part:Bba_R0063  | DVA             | 66004                                 | CIDAR_514                         | <a href="https://benchling.com/s/etg7OrN6/edit">https://benchling.com/s/etg7OrN6/edit</a> |
|                  |                                      |                                |                 | 66005                                 | CIDAR_515                         | <a href="https://benchling.com/s/FamBps3h/edit">https://benchling.com/s/FamBps3h/edit</a> |
|                  |                                      |                                |                 | 66006                                 | CIDAR_516                         | <a href="https://benchling.com/s/oi1T00L0/edit">https://benchling.com/s/oi1T00L0/edit</a> |
|                  |                                      |                                |                 | 66007                                 | CIDAR_517                         | <a href="https://benchling.com/s/Yw6bgPjg/edit">https://benchling.com/s/Yw6bgPjg/edit</a> |
|                  |                                      |                                |                 | 66008                                 | CIDAR_518                         | <a href="https://benchling.com/s/3RYAjd6u/edit">https://benchling.com/s/3RYAjd6u/edit</a> |
|                  |                                      |                                |                 | 66009                                 | CIDAR_519                         | <a href="https://benchling.com/s/SNZHRImR/edit">https://benchling.com/s/SNZHRImR/edit</a> |
|                  |                                      |                                |                 | 66010                                 | CIDAR_520                         | <a href="https://benchling.com/s/nyzVqekN/edit">https://benchling.com/s/nyzVqekN/edit</a> |
|                  |                                      |                                |                 | 66011                                 | CIDAR_521                         | <a href="https://benchling.com/s/473M59P8/edit">https://benchling.com/s/473M59P8/edit</a> |
|                  |                                      |                                |                 | 66012                                 | CIDAR_522                         | <a href="https://benchling.com/s/EUFuZKHP/edit">https://benchling.com/s/EUFuZKHP/edit</a> |

|                  |                                                             |                                |     |       |           |                                                                                           |
|------------------|-------------------------------------------------------------|--------------------------------|-----|-------|-----------|-------------------------------------------------------------------------------------------|
| <i>R0063_FB</i>  | Basic Part - Promoter (Controllable)                        | parts.igem.org/Part:Bba_R0063  | DVA | 66013 | CIDAR_523 | <a href="https://benchling.com/s/PN1VmcWg/edit">https://benchling.com/s/PN1VmcWg/edit</a> |
| <i>R0063_FB</i>  | Basic Part - Promoter (Controllable)                        | parts.igem.org/Part:Bba_R0063  | DVA | 66014 | CIDAR_524 | <a href="https://benchling.com/s/xnA98Y5U/edit">https://benchling.com/s/xnA98Y5U/edit</a> |
| <i>R0063_GB</i>  | Basic Part - Promoter (Controllable)                        | parts.igem.org/Part:Bba_R0063  | DVA | 66015 | CIDAR_525 | <a href="https://benchling.com/s/jHQHwAaD/edit">https://benchling.com/s/jHQHwAaD/edit</a> |
| <i>I13453_AB</i> | Basic Part - Promoter (Controllable)                        | parts.igem.org/Part:Bba_I13453 | DVA | 66016 | CIDAR_526 | <a href="https://benchling.com/s/HE4joK6k/edit">https://benchling.com/s/HE4joK6k/edit</a> |
| <i>I13453_FB</i> | Basic Part - Promoter (Controllable)                        | parts.igem.org/Part:Bba_I13453 | DVA | 66017 | CIDAR_527 | <a href="https://benchling.com/s/YC8NeyAe/edit">https://benchling.com/s/YC8NeyAe/edit</a> |
| <i>I13453_FB</i> | Basic Part - Promoter (Controllable)                        | parts.igem.org/Part:Bba_I13453 | DVA | 66018 | CIDAR_528 | <a href="https://benchling.com/s/c4zFwYww/edit">https://benchling.com/s/c4zFwYww/edit</a> |
| <i>I13453_GB</i> | Basic Part - Promoter (Controllable)                        | parts.igem.org/Part:Bba_I13453 | DVA | 66019 | CIDAR_529 | <a href="https://benchling.com/s/i9YCgIRi/edit">https://benchling.com/s/i9YCgIRi/edit</a> |
| <i>B0032m_BC</i> | Basic Part - RBS (RBS)                                      | parts.igem.org/Part:Bba_B0032  | DVA | 66020 | CIDAR_530 | <a href="https://benchling.com/s/jwIsLDg9/edit">https://benchling.com/s/jwIsLDg9/edit</a> |
| <i>B0033m_BC</i> | Basic Part - RBS (RBS)                                      | parts.igem.org/Part:Bba_B0033  | DVA | 66021 | CIDAR_531 | <a href="https://benchling.com/s/FQFaG78R/edit">https://benchling.com/s/FQFaG78R/edit</a> |
| <i>B0034m_BC</i> | Basic Part - RBS (RBS)                                      | parts.igem.org/Part:Bba_B0034  | DVA | 66022 | CIDAR_532 | <a href="https://benchling.com/s/kBNYDAHo/edit">https://benchling.com/s/kBNYDAHo/edit</a> |
| <i>BCD12_BC</i>  | Basic Part - RBS (BiCistronic Design (BCD))                 | www.biofab.org                 | DVA | 66023 | CIDAR_533 | <a href="https://benchling.com/s/mUcZUqJo/edit">https://benchling.com/s/mUcZUqJo/edit</a> |
| <i>BCD2_BC</i>   | Basic Part - RBS (BiCistronic Design (BCD))                 | www.biofab.org                 | DVA | 66024 | CIDAR_534 | <a href="https://benchling.com/s/jM8sZdRg/edit">https://benchling.com/s/jM8sZdRg/edit</a> |
| <i>BCD8_BC</i>   | Basic Part - RBS (BiCistronic Design (BCD))                 | www.biofab.org                 | DVA | 66025 | CIDAR_535 | <a href="https://benchling.com/s/8UhD5Vaf/edit">https://benchling.com/s/8UhD5Vaf/edit</a> |
| <i>C0012m_CD</i> | Basic Part - CDS (Transcription factor)                     | parts.igem.org/Part:Bba_C0012  | DVA | 66026 | CIDAR_536 | <a href="https://benchling.com/s/1RopAYal/edit">https://benchling.com/s/1RopAYal/edit</a> |
| <i>C0040_CD</i>  | Basic Part - CDS (Transcription factor)                     | parts.igem.org/Part:Bba_C0040  | DVA | 66027 | CIDAR_537 | <a href="https://benchling.com/s/M9uZpTOg/edit">https://benchling.com/s/M9uZpTOg/edit</a> |
| <i>C0062_CD</i>  | Basic Part - CDS (Transcription factor)                     | parts.igem.org/Part:Bba_C0062  | DVA | 66028 | CIDAR_538 | <a href="https://benchling.com/s/FFyxWiWt/edit">https://benchling.com/s/FFyxWiWt/edit</a> |
| <i>C0080_CD</i>  | Basic Part - CDS (Transcription factor)                     | parts.igem.org/Part:Bba_C0080  | DVA | 66029 | CIDAR_539 | <a href="https://benchling.com/s/FFyxWiWt/edit">https://benchling.com/s/FFyxWiWt/edit</a> |
| <i>cre_CD</i>    | Basic Part - CDS (Recombinase)                              | Gift from Dr. Josh Gilmore     | DVA | 66030 | CIDAR_540 | <a href="https://benchling.com/s/CAXPcaMy/edit">https://benchling.com/s/CAXPcaMy/edit</a> |
| <i>E0030_CD</i>  | Basic Part - CDS (Fluorescent reporter - YFP)               | parts.igem.org/Part:Bba_E0030  | DVA | 66031 | CIDAR_541 | <a href="https://benchling.com/s/cr12BVOE/edit">https://benchling.com/s/cr12BVOE/edit</a> |
| <i>E0040m_CD</i> | Basic Part - CDS (Fluorescent reporter - GFP)               | parts.igem.org/Part:Bba_E0040  | DVA | 66032 | CIDAR_542 | <a href="https://benchling.com/s/cj91KrVH/edit">https://benchling.com/s/cj91KrVH/edit</a> |
| <i>E1010m_CD</i> | Basic Part - CDS (Fluorescent reporter - RFP)               | parts.igem.org/Part:Bba_E1010  | DVA | 66033 | CIDAR_543 | <a href="https://benchling.com/s/1AbCv00F/edit">https://benchling.com/s/1AbCv00F/edit</a> |
| <i>eBFP2_CD</i>  | Basic Part - CDS (Fluorescent reporter - BFP)               | Addgene - #14891               | DVA | 66034 | CIDAR_544 | <a href="https://benchling.com/s/bbkctFdr/edit">https://benchling.com/s/bbkctFdr/edit</a> |
| <i>B0015_DE</i>  | Basic Part - Terminator (Double Terminator)                 | parts.igem.org/Part:Bba_B0015  | DVA | 66035 | CIDAR_545 | <a href="https://benchling.com/s/a1cHND33/edit">https://benchling.com/s/a1cHND33/edit</a> |
| <i>B0015_DF</i>  | Basic Part - Terminator (Double Terminator)                 | parts.igem.org/Part:Bba_B0015  | DVA | 66036 | CIDAR_546 | <a href="https://benchling.com/s/f6RaEG2K/edit">https://benchling.com/s/f6RaEG2K/edit</a> |
| <i>B0015_DG</i>  | Basic Part - Terminator (Double Terminator)                 | parts.igem.org/Part:Bba_B0015  | DVA | 66037 | CIDAR_547 | <a href="https://benchling.com/s/5pFYtKSF/edit">https://benchling.com/s/5pFYtKSF/edit</a> |
| <i>B0015_DH</i>  | Basic Part - Terminator (Double Terminator)                 | parts.igem.org/Part:Bba_B0015  | DVA | 66038 | CIDAR_548 | <a href="https://benchling.com/s/8st8vLIQ/edit">https://benchling.com/s/8st8vLIQ/edit</a> |
| <i>DVA_AB</i>    | Destination Vector (For Basic Parts and Devices Ampicillin) | parts.igem.org/Part:pSB1A2     | DVA | 66039 | CIDAR_549 | <a href="https://benchling.com/s/slHkWK6p/edit">https://benchling.com/s/slHkWK6p/edit</a> |
| <i>DVA_AE</i>    | Destination Vector (For Basic Parts and Devices Ampicillin) | parts.igem.org/Part:pSB1A2     | DVA | 66040 | CIDAR_550 | <a href="https://benchling.com/s/jBqtviMA/edit">https://benchling.com/s/jBqtviMA/edit</a> |
| <i>DVA_AF</i>    | Destination Vector (For Basic Parts and Devices Ampicillin) | parts.igem.org/Part:pSB1A2     | DVA | 66041 | CIDAR_551 | <a href="https://benchling.com/s/NviiNLlp/edit">https://benchling.com/s/NviiNLlp/edit</a> |
| <i>DVA_AG</i>    | Destination Vector (For Basic Parts and Devices Ampicillin) | parts.igem.org/Part:pSB1A2     | DVA | 66042 | CIDAR_552 | <a href="https://benchling.com/s/pPe92CO5/edit">https://benchling.com/s/pPe92CO5/edit</a> |
| <i>DVA_AH</i>    | Destination Vector (For Basic Parts and Devices Ampicillin) | parts.igem.org/Part:pSB1A2     | DVA | 66043 | CIDAR_553 | <a href="https://benchling.com/s/iaYdvIV2/edit">https://benchling.com/s/iaYdvIV2/edit</a> |
| <i>DVA_BC</i>    | Destination Vector (For Basic Parts and Devices Ampicillin) | parts.igem.org/Part:pSB1A2     | DVA | 66044 | CIDAR_554 | <a href="https://benchling.com/s/o7TOrOp/edit">https://benchling.com/s/o7TOrOp/edit</a>   |
| <i>DVA_CD</i>    | Destination Vector (For Basic Parts and Devices Ampicillin) | parts.igem.org/Part:pSB1A2     | DVA | 66045 | CIDAR_555 | <a href="https://benchling.com/s/xgdB8Znv/edit">https://benchling.com/s/xgdB8Znv/edit</a> |
| <i>DVA_DE</i>    | Destination Vector (For Basic Parts and Devices Ampicillin) | parts.igem.org/Part:pSB1A2     | DVA | 66046 | CIDAR_556 | <a href="https://benchling.com/s/mtpMynXT/edit">https://benchling.com/s/mtpMynXT/edit</a> |
| <i>DVA_DF</i>    | Destination Vector (For Basic Parts and Devices Ampicillin) | parts.igem.org/Part:pSB1A2     | DVA | 66047 | CIDAR_557 | <a href="https://benchling.com/s/53Wxb2s/edit">https://benchling.com/s/53Wxb2s/edit</a>   |



|                       |                                                             |                            |     |       |           |                                                                                           |
|-----------------------|-------------------------------------------------------------|----------------------------|-----|-------|-----------|-------------------------------------------------------------------------------------------|
| <i>DVA_DG</i>         | Destination Vector (For Basic Parts and Devices Ampicillin) | parts.igem.org/Part:pSB1A2 | DVA | 66048 | CIDAR_558 | <a href="https://benchling.com/s/bJdQOwZP/edit">https://benchling.com/s/bJdQOwZP/edit</a> |
| <i>DVA_DH</i>         | Destination Vector (For Basic Parts and Devices Ampicillin) | parts.igem.org/Part:pSB1A2 | DVA | 66049 | CIDAR_559 | <a href="https://benchling.com/s/sGGQDAg6/edit">https://benchling.com/s/sGGQDAg6/edit</a> |
| <i>DVA_EB</i>         | Destination Vector (For Basic Parts and Devices Ampicillin) | parts.igem.org/Part:pSB1A2 | DVA | 66050 | CIDAR_560 | <a href="https://benchling.com/s/i5JEIhUg/edit">https://benchling.com/s/i5JEIhUg/edit</a> |
| <i>DVA_EF</i>         | Destination Vector (For Basic Parts and Devices Ampicillin) | parts.igem.org/Part:pSB1A2 | DVA | 66051 | CIDAR_561 | <a href="https://benchling.com/s/OISBaZCj/edit">https://benchling.com/s/OISBaZCj/edit</a> |
| <i>DVA_EG</i>         | Destination Vector (For Basic Parts and Devices Ampicillin) | parts.igem.org/Part:pSB1A2 | DVA | 66052 | CIDAR_562 | <a href="https://benchling.com/s/xGeYtbZx/edit">https://benchling.com/s/xGeYtbZx/edit</a> |
| <i>DVA_EH</i>         | Destination Vector (For Basic Parts and Devices Ampicillin) | parts.igem.org/Part:pSB1A2 | DVA | 66053 | CIDAR_563 | <a href="https://benchling.com/s/fnTqha2S/edit">https://benchling.com/s/fnTqha2S/edit</a> |
| <i>DVA_FB</i>         | Destination Vector (For Basic Parts and Devices Ampicillin) | parts.igem.org/Part:pSB1A2 | DVA | 66054 | CIDAR_564 | <a href="https://benchling.com/s/3CuYwFwU/edit">https://benchling.com/s/3CuYwFwU/edit</a> |
| <i>DVA_GB</i>         | Destination Vector (For Basic Parts and Devices Ampicillin) | parts.igem.org/Part:pSB1A2 | DVA | 66055 | CIDAR_565 | <a href="https://benchling.com/s/UvuVapbV/edit">https://benchling.com/s/UvuVapbV/edit</a> |
| <i>DVA</i>            | Destination Vector (Backbone for new DVs)                   | --                         | DVA | 66056 | CIDAR_566 | <a href="https://benchling.com/s/6hijqfvT/edit">https://benchling.com/s/6hijqfvT/edit</a> |
| <i>pJ02B2Gm_AE</i>    | Transcriptional Unit (FACS Controls)                        | --                         | DVA | 66057 | CIDAR_567 | <a href="https://benchling.com/s/mgYDcL4z/edit">https://benchling.com/s/mgYDcL4z/edit</a> |
| <i>pJ02B2Gm_EF</i>    | Transcriptional Unit (FACS Controls)                        | --                         | DVA | 66058 | CIDAR_568 | <a href="https://benchling.com/s/3WQbdlzU/edit">https://benchling.com/s/3WQbdlzU/edit</a> |
| <i>pJ02B2Rm_AE</i>    | Transcriptional Unit (FACS Controls)                        | --                         | DVA | 66059 | CIDAR_569 | <a href="https://benchling.com/s/Kb4AAbox/edit">https://benchling.com/s/Kb4AAbox/edit</a> |
| <i>pJ02B2Rm_EF</i>    | Transcriptional Unit (FACS Controls)                        | --                         | DVA | 66060 | CIDAR_570 | <a href="https://benchling.com/s/FOM8uxtS/edit">https://benchling.com/s/FOM8uxtS/edit</a> |
| <i>pJ02B2Gm:Rm_AF</i> | Device (FACS Controls)                                      | --                         | DVA | 66061 | CIDAR_571 | <a href="https://benchling.com/s/D75ziv6K/edit">https://benchling.com/s/D75ziv6K/edit</a> |
| <i>pJ02B2Rm:Gm_AF</i> | Device (FACS Controls)                                      | --                         | DVA | 66062 | CIDAR_572 | <a href="https://benchling.com/s/OOkaVw1a/edit">https://benchling.com/s/OOkaVw1a/edit</a> |
| <i>pJ02B2Gm_AE</i>    | Transcriptional Unit (FACS Controls)                        | --                         | DVK | 66063 | CIDAR_573 | <a href="https://benchling.com/s/ShVJxDdF/edit">https://benchling.com/s/ShVJxDdF/edit</a> |
| <i>pJ02B2Gm_EF</i>    | Transcriptional Unit (FACS Controls)                        | --                         | DVK | 66064 | CIDAR_574 | <a href="https://benchling.com/s/uUTmefO7/edit">https://benchling.com/s/uUTmefO7/edit</a> |
| <i>pJ02B2Rm_AE</i>    | Transcriptional Unit (FACS Controls)                        | --                         | DVK | 66065 | CIDAR_575 | <a href="https://benchling.com/s/syrZcMB4/edit">https://benchling.com/s/syrZcMB4/edit</a> |
| <i>pJ02B2Rm_EF</i>    | Transcriptional Unit (FACS Controls)                        | --                         | DVK | 66066 | CIDAR_576 | <a href="https://benchling.com/s/nNICVGuk/edit">https://benchling.com/s/nNICVGuk/edit</a> |
| <i>DVK_AE</i>         | Destination Vector (For Transcriptional Units Kanamycin)    | parts.igem.org/Part:pSB1K3 | DVK | 66067 | CIDAR_577 | <a href="https://benchling.com/s/sueyphOw/edit">https://benchling.com/s/sueyphOw/edit</a> |
| <i>DVK_AF</i>         | Destination Vector (For Transcriptional Units Kanamycin)    | parts.igem.org/Part:pSB1K3 | DVK | 66068 | CIDAR_578 | <a href="https://benchling.com/s/1i0mX41y/edit">https://benchling.com/s/1i0mX41y/edit</a> |
| <i>DVK_EF</i>         | Destination Vector (For Transcriptional Units Kanamycin)    | parts.igem.org/Part:pSB1K3 | DVK | 66069 | CIDAR_579 | <a href="https://benchling.com/s/7FuJO5tD/edit">https://benchling.com/s/7FuJO5tD/edit</a> |
| <i>DVK_FG</i>         | Destination Vector (For Transcriptional Units Kanamycin)    | parts.igem.org/Part:pSB1K3 | DVK | 66070 | CIDAR_580 | <a href="https://benchling.com/s/Cz5hQ9wM/edit">https://benchling.com/s/Cz5hQ9wM/edit</a> |
| <i>DVK_GH</i>         | Destination Vector (For Transcriptional Units Kanamycin)    | parts.igem.org/Part:pSB1K3 | DVK | 66071 | CIDAR_581 | <a href="https://benchling.com/s/MFw9pNDU/edit">https://benchling.com/s/MFw9pNDU/edit</a> |
| <i>DVK</i>            | Destination Vector (Backbone for new DVs)                   | --                         | DVK | 66072 | CIDAR_582 | <a href="https://benchling.com/s/olS42cDR/edit">https://benchling.com/s/olS42cDR/edit</a> |
